# Supplementary material for: Concurrent improvements in coercivity and corrosion resistance for Nd6Fe13Ga-reconstructed Nd–Fe–B sintered magnets
Source: Royal Society of Chemistry journal article supplement (doi:10.1039/d4tc04062g), 2024-11-06
Supplement: d4tc04062g1.pdf [file d4tc04062g1.pdf]

## **Supplementary information**

### **Concurrent improvements of coercivity and corrosion resistance for Nd<sub>6</sub>Fe<sub>13</sub>Ga reconstructed Nd-Fe-B sintered magnets**

Rui Shen<sup>1</sup>, Shuainan Xu<sup>1</sup>, Congyi Wang<sup>2</sup>, Enxiang Yang<sup>3</sup>, Xiaolian Liu<sup>1, 3,\*</sup>, Song  
Fu<sup>1,2</sup>, Weiyang Jin<sup>3</sup>, Yu Pan<sup>1</sup>, Lizhong Zhao<sup>1</sup>, Pengfei Guan<sup>4</sup>, Xuefeng Zhang<sup>1,\*</sup>

1. Institute of Advanced Magnetic Materials, College of Materials and  
Environmental Engineering, Hangzhou Dianzi University, Hangzhou, 310018,  
China

2. Zhejiang Innuovo Magnetism Co., Ltd., Jinhua 322118, China

3. Ningbo Permanent Magnets Co., Ltd., Ningbo 315032, China

4. Beijing Computational Science Research Center, Beijing 100193, China

5.

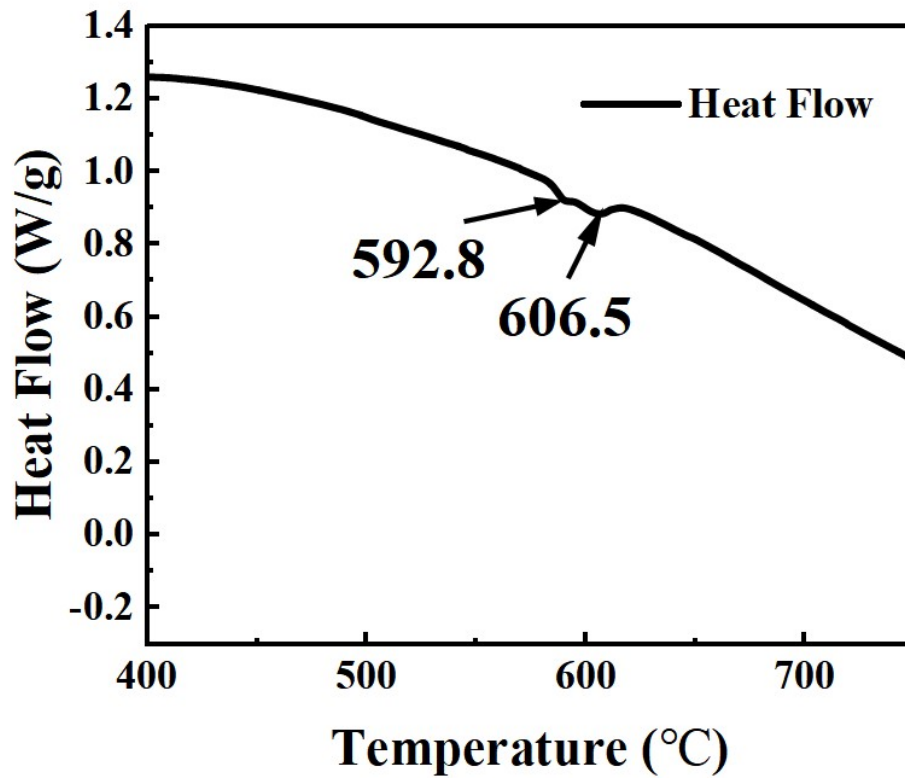

Fig. S1. DSC curves of Nd-Fe-Ga alloy.

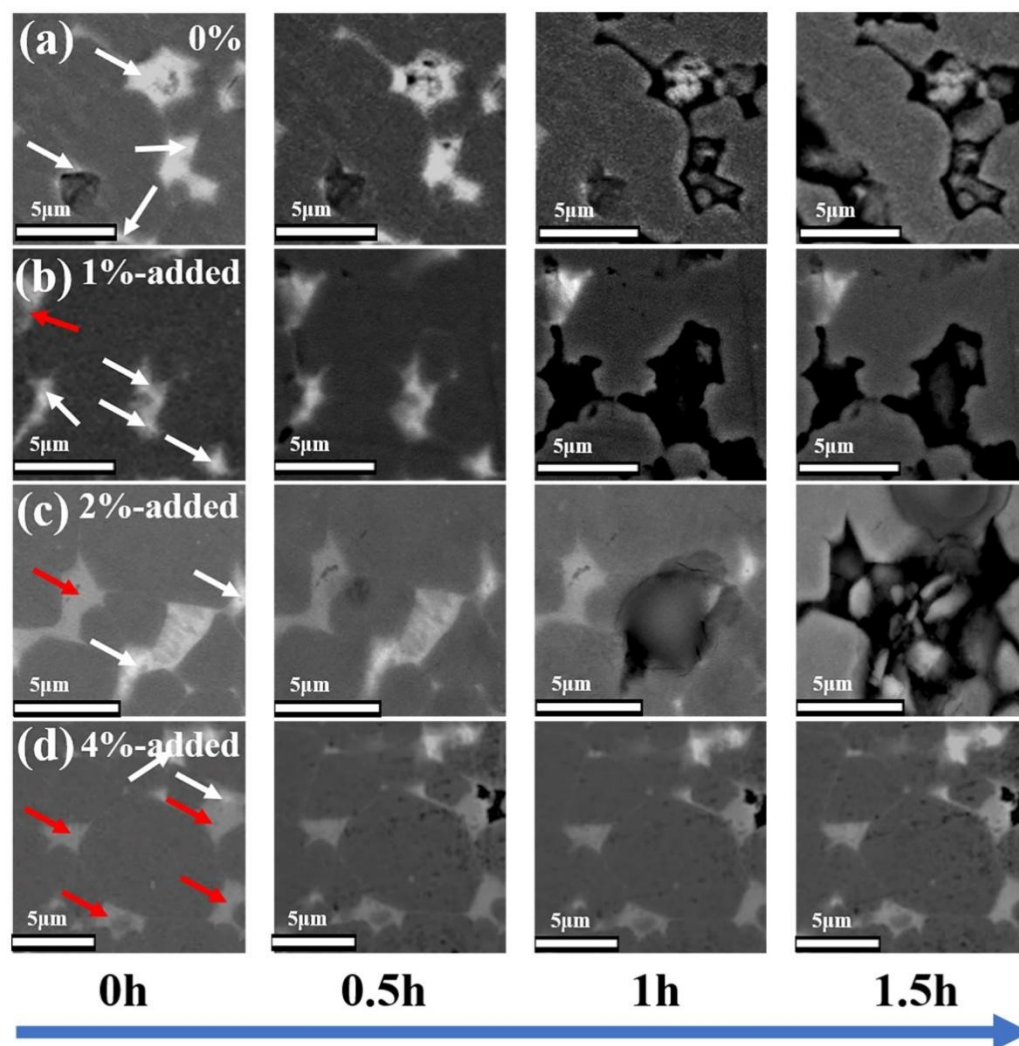

**Fig. S2.** Corrosion morphology evolution of different phases for the investigated magnets with different Nd-Fe-Ga addition after immersing in 3.5% NaCl solution varying for different times. *In-situ* images in the local area for 0 (a), 1% (b), 2% (c) and 4% addition(d) ranging from 0 to 90 min.
